# Supplementary material
Source: Springer Nature journal article supplement (https://www.springermedizin.de/resource/supplementary/12916_2010_317_MOESM1_ESM.pdf/9599624)

**Pain intensity at presentation and risk of PHN at different time intervals**

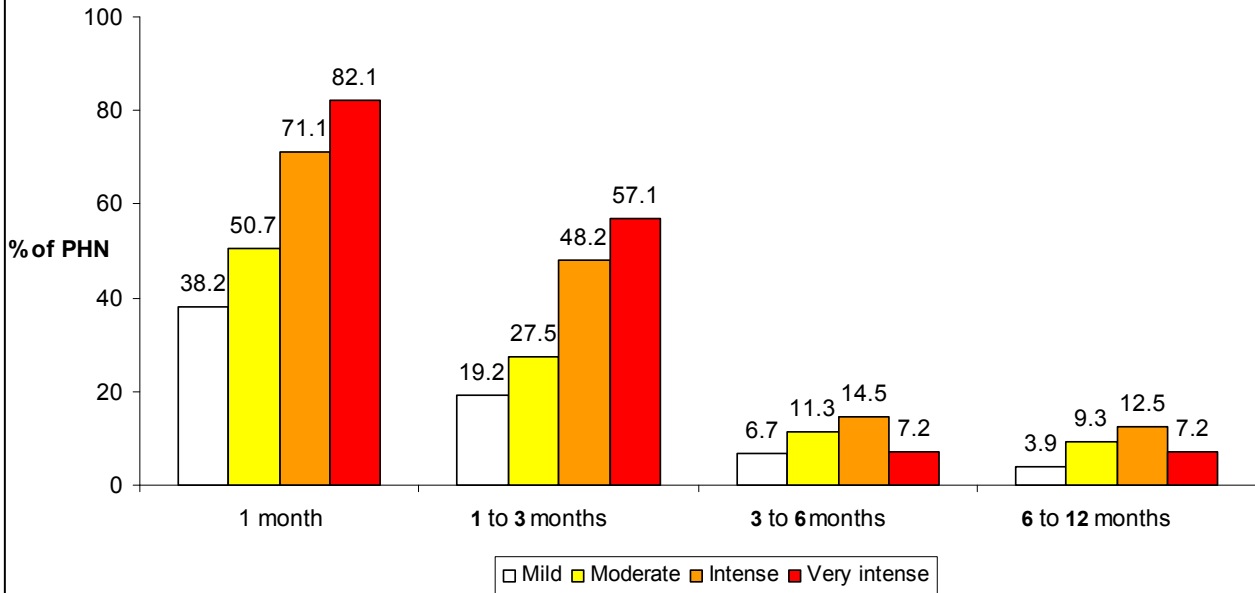

Supplement: MOESM1 [file 9599624]
